# Supplementary material
Source: ML conference proceedings conference paper supplement (https://www.ecva.net/papers/eccv_2022/papers_ECCV/html/136950436_ECCV_2022_paper.php)
Supplement: Supplementary file 3 [file 136950436-supp.zip]

Archive with 8 entries (8 files):
- README.txt
- __MACOSX/._README.txt
- Synthetic2.avi
- __MACOSX/._Synthetic2.avi
- Supplementary.pdf
- __MACOSX/._Supplementary.pdf
- MEVAClip1.avi
- __MACOSX/._MEVAClip1.avi
