# Supplementary material
Source: ML conference proceedings conference paper supplement (https://www.ecva.net/papers/eccv_2022/papers_ECCV/html/136950436_ECCV_2022_paper.php)
Supplement: Supplementary file 3 [file 136950436-supp.zip › README.txt]

The video codecs for both Synthetic2.avi and MEVAClip1.avi are DivX. The DivX codec can be downloaded for free here: https://www.divx.com/en/software/divx/
